# Supplementary material
Source: MDPI journal article supplement (https://www.mdpi.com/2073-4344/12/10/1274)
Supplement: s1 [file s1 › catalysts-1969799-supplementary.pdf]

## SUPPLEMENTARY MATERIAL

# Solvent-Free Synthesis of Nickel Nanoparticles as Catalysts for CO<sub>2</sub> hydrogenation to Methane

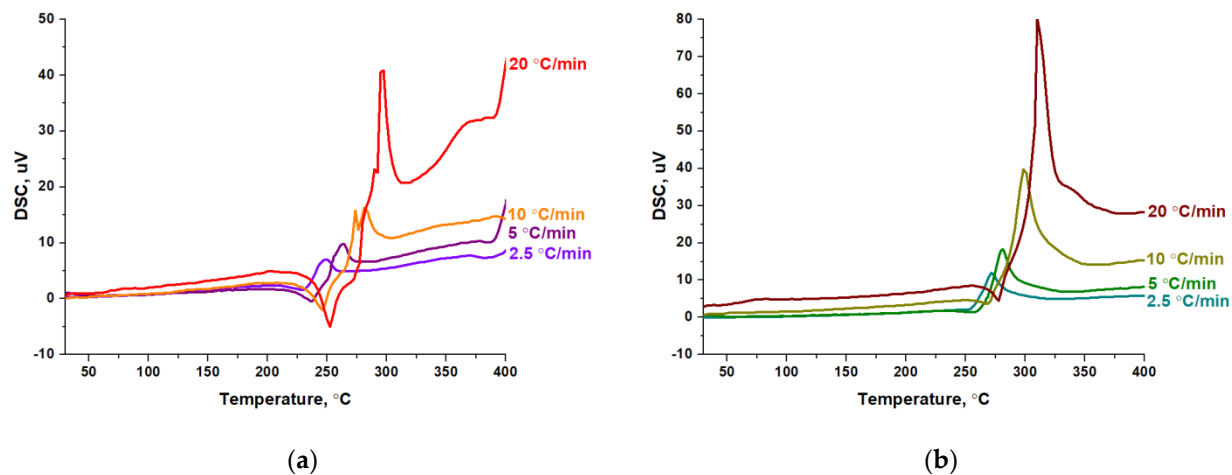

Figure S1. DSC data for (a)  $[\text{Ni}(\text{C}_3\text{H}_4\text{N}_2)_6](\text{NO}_3)_2$  and (b)  $[\text{Ni}(\text{C}_3\text{H}_4\text{N}_2)_6](\text{ClO}_4)_2$  complexes at different heating rates.

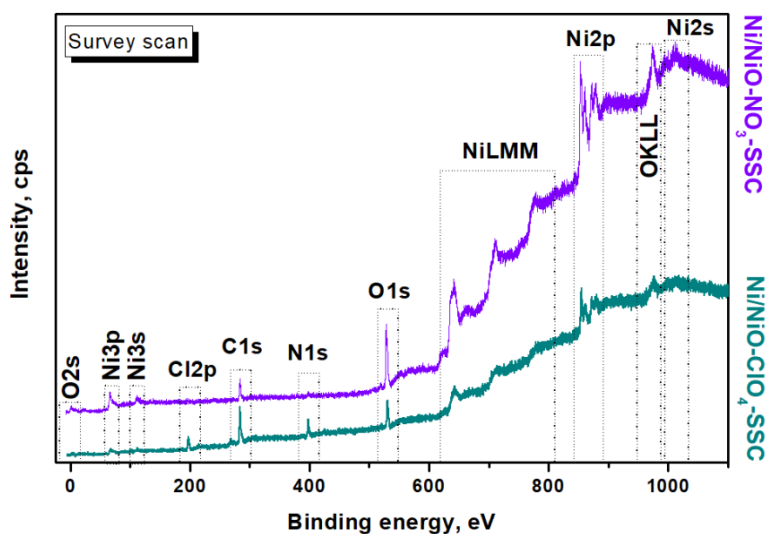

Figure S2. XPS survey spectra for  $\text{Ni}/\text{NiO}-\text{NO}_3\text{-SSC}$  and  $\text{Ni}/\text{NiO}-\text{ClO}_4\text{-SSC}$ .
